# Supplementary material
Source: PubMed Central journal article supplement (PMC7483849)

Supplementary Table S1: Clinicopathological characteristics in public datasets

|                       | TCGA cohort, n (%)<br>(n = 167) | GSE24279 cohort, n (%)<br>(n = 77) | GSE32688 cohort, n (%)<br>(n = 25) |
|-----------------------|---------------------------------|------------------------------------|------------------------------------|
| Gender                |                                 |                                    |                                    |
| Male                  | 92 (55.1)                       | 51 (66.2)                          | N/A                                |
| Female                | 75 (44.9)                       | 25 (32.5)                          | N/A                                |
| N/A                   | 0 (0.0)                         | 1 (1.3)                            | 25 (100.0)                         |
| Age (years)           |                                 |                                    |                                    |
| median (range)        | 65 (35-88)                      | 65 (40-85)                         | N/A                                |
| N/A                   | 0 (0.0)                         | 3 (3.9)                            | 25 (100.0)                         |
| Tumor location        |                                 |                                    |                                    |
| Ph                    | 141 (84.4)                      | N/A                                | N/A                                |
| Pbt                   | 26 (15.6)                       | N/A                                | N/A                                |
| T status              |                                 |                                    |                                    |
| T1-2                  | 28 (10.8)                       | 4 (5.2)                            | N/A                                |
| T3-4                  | 139 (89.2)                      | 73 (94.8)                          | N/A                                |
| Lymph node metastases |                                 |                                    |                                    |
| Negative              | 46 (27.5)                       | 8 (10.4)                           | 8 (32.0)                           |
| Positive              | 121 (72.5)                      | 69 (89.6)                          | 17 (68.0)                          |
| UICC stage (ver.7)    |                                 |                                    |                                    |
| IA, IB                | 18 (10.8)                       | 1 (1.3)                            | 2 (8.0)                            |
| IIA                   | 26 (15.6)                       | 7 (9.1)                            | 6 (24.0)                           |
| IIB                   | 119 (71.2)                      | 64 (83.1)                          | 17 (68.0)                          |
| III                   | 4 (2.4)                         | 5 (6.5)                            | 0 (0.0)                            |
| IV                    | 0 (0.0)                         | 0 (0.0)                            | 0 (0.0)                            |

N/A, Not available; UICC, International Union Against Cancer

**Supplementary Table S2: Clinicopathological characteristics of Pre-Neoadjuvant therapy EUS-FNA biopsy cohort**

| Characteristics                                | Pre-Neoadjuvant therapy EUS-FNA biopsy specimens, n (%)<br>(n = 62) |
|------------------------------------------------|---------------------------------------------------------------------|
| Gender                                         |                                                                     |
| Male                                           | 37 (59.7)                                                           |
| Female                                         | 25 (40.3)                                                           |
| Age (years)                                    |                                                                     |
| median (range)                                 | 70 (47-79)                                                          |
| Pre-Neoadjuvant therapy CA19-9 (U/mL)          |                                                                     |
| median (range)                                 | 80.5 (1-4956)                                                       |
| Tumor location                                 |                                                                     |
| Ph                                             | 32 (51.6)                                                           |
| Pbt                                            | 30 (48.4)                                                           |
| Pre-Neoadjuvant therapy tumor size (CT, mm)    |                                                                     |
| median (range)                                 | 25 (9-80)                                                           |
| Pre-Neoadjuvant therapy Resectability status   |                                                                     |
| Resectable                                     | 52 (83.9)                                                           |
| Borderline resectable                          | 10 (16.1)                                                           |
| ypT status (Post-Neoadjuvant therapy)          |                                                                     |
| T0                                             | 1 (1.6)                                                             |
| T1                                             | 12 (19.4)                                                           |
| T2                                             | 2 (3.2)                                                             |
| T3                                             | 47 (75.8)                                                           |
| T4                                             | 0 (0.0)                                                             |
| ypN status (Post-Neoadjuvant therapy)          |                                                                     |
| N0                                             | 53 (85.5)                                                           |
| N1                                             | 9 (14.5)                                                            |
| UICC ypStage (ver.7, Post-Neoadjuvant therapy) |                                                                     |
| 0                                              | 1 (1.6)                                                             |
| IA                                             | 12 (19.4)                                                           |
| IB                                             | 2 (3.2)                                                             |
| IIA                                            | 38 (61.3)                                                           |
| IIB                                            | 9 (14.5)                                                            |
| III                                            | 0 (0.0)                                                             |
| IV                                             | 0 (0.0)                                                             |
| Neoadjuvant therapy                            |                                                                     |
| Gemcitabine + Radiation                        | 58 (93.5)                                                           |
| Gemcitabine + S-1 + Radiation                  | 4 (6.5)                                                             |
| Adjuvant therapy                               |                                                                     |
| Yes                                            | 62 (100.0)                                                          |
| No                                             | 0 (0.0)                                                             |

*EUS-FNA*, Endoscopic ultrasound - guided fine needle aspiration

*UICC*, International Union Against Cancer

**Supplementary Table S3: Recent studies reporting the clinical significance of 6 candidate miRNAs as cancer biomarkers**

| miRNA        | Cancers                           | Clinical significance                                                         | Reference  |
|--------------|-----------------------------------|-------------------------------------------------------------------------------|------------|
| miR-155-5p   | Pancreatic ductal adenocarcinoma  | Cancer detection, Prognosis (unfavorable)                                     | 69-72      |
|              | Gastric cancer                    | Tumor penetration through serosa and lymph node metastasis                    | 67         |
|              | Colorectal cancer                 | Poor Prognosis (unfavorable) and treatment resistance                         | 73         |
|              | Hepatocellular carcinoma          | Cancer detection, Prognosis (unfavorable)                                     | 74         |
|              | Lung cancer                       | Cancer detection, recurrence and metastasis                                   | 75, 76     |
|              | Bladder cancer                    | Detection for invasive cancer                                                 | 77         |
|              | Sinonasal Squamous Cell Carcinoma | Regional recurrence                                                           | 78         |
|              | Neuroglioma                       | Prognosis (unfavorable)                                                       | 79         |
| miR-196b-5p  | Pancreatic ductal adenocarcinoma  | Cancer detection, Prognosis (unfavorable)                                     | 72, 80-82  |
|              | Gastric cancer                    | Cancer detection, Prognosis (unfavorable)                                     | 83, 84     |
|              | Colorectal cancer                 | Cancer detection, Prognosis (unfavorable), Chemoresistance                    | 85-88      |
|              | Hepatocellular carcinoma          | Prognosis (unfavorable), Tumor size, multiple tumor, vascular invasion        | 89, 90     |
|              | Oral cancer                       | Cancer detection                                                              | 91         |
| miR-365a-5p  | Lung cancer                       | Prognosis (unfavorable)                                                       | 92         |
| miR-629-5p   | Pancreatic ductal adenocarcinoma  | Cancer detection, Advanced stage, Distant metastasis, Prognosis (unfavorable) | 93         |
|              | Gastric cancer                    | Cancer detection                                                              | 94         |
| miR-675-3p   |                                   |                                                                               | No reports |
| miR-92b-3p   | Pancreatic ductal adenocarcinoma  | Prognosis (favorable), Small tumor size, Lymph node metastasis negative       | 68         |
|              | Esophageal cancer                 | Prognosis (favorable), Prognosis (unvorable)                                  | 95         |
|              | Gastric cancer                    | Cancer detection                                                              | 96         |
|              | Colorectal cancer                 | Cancer detection, Chemotherapy response                                       | 97-99      |
|              | Hepatocellular carcinoma          | Recurrence prediction, Microvascular invasion                                 | 100, 101   |
|              | Nasopharyngeal cancer             | Prognosis (favorable)                                                         | 102        |
|              | Breast cancer                     | Prognosis (favorable)                                                         | 103        |
|              | Oral squamous cell carcinoma      | Recurrence prediction (favorable), Prognosis (unfavorable)                    | 104, 105   |
| Glioblastoma | Prognosis (unfavorable)           | 106                                                                           |            |

**Supplementary Table S4: miRNA-mRNA network analysis of 6 candidate miRNAs**

| miRNA-mRNA regulatory analysis |              |                |              |                |              |
|--------------------------------|--------------|----------------|--------------|----------------|--------------|
| miRNA                          | Target Genes | miRNA          | Target Genes | miRNA          | Target Genes |
|                                | KANSL1       |                | KCNC4        |                | NECTIN1      |
|                                | PATJ         |                | NOL4L        |                | KCNA1        |
|                                | FAM135A      |                | DBT          |                | ZNF512B      |
|                                | BCAT1        |                | DNAJB12      |                | LRCH1        |
|                                | ARL5B        |                | GIT2         |                | GPR180       |
|                                | UQCR11       |                | MAN2A1       |                | GDF11        |
|                                | KLF3         |                | MEF2D        |                | PIP4K2C      |
|                                | VAV3         |                | MYO5A        |                | PPP1R12A     |
|                                | CYB561D1     |                | GLYR1        |                | CALN1        |
|                                | ATXN1L       |                | SPOCK2       |                | FAM133B      |
|                                | FBXO33       |                | GNAQ         |                | PPP1R9A      |
|                                | MIER3        |                | MAP2K4       |                | TBL1XR1      |
| hsa-miR-155-5p                 | RELA         |                | PTAR1        |                | PCDH11Y      |
|                                | TENM3        |                | SLC7A11      |                | DESI1        |
|                                | GABRA1       |                | RSBN1        |                | EFR3A        |
|                                | TM9SF3       |                | SERTAD3      |                | NFIB         |
|                                | CPEB4        |                | RBFOX2       |                | SFMBT2       |
|                                | CDC73        |                | DKK3         |                | CELF2        |
|                                | MYLK         |                | TULP4        |                | PLXDC2       |
|                                | DENND1B      | hsa-miR-92b-3p | YIPF4        | hsa-miR-92b-3p | MARCHF8      |
|                                | DPY19L1      |                | ATP7A        |                | PIK3R3       |
|                                | SP1          |                | DAB2IP       |                | NFIA         |
|                                | CCR9         |                | E2F3         |                | TOR1AIP2     |
|                                | GLIPR1       |                | FXR1         |                | QKI          |
|                                | ZNF561       |                | SPRYD4       |                | ATXN3        |
|                                | NR6A1        |                | PTPRJ        |                | FAM110B      |
|                                | IGF2BP1      |                | INSIG1       |                | FRYL         |
|                                | NXPE3        |                | PAPD7        |                | CXCL5        |
|                                | MIEF1        |                | BCL2L11      |                | LIN54        |
|                                | BACH1        |                | PPP1R37      |                | LIN28A       |
|                                | LCOR         |                | RAB8B        |                | GAS2L3       |
| hsa-miR-196b-5p                | SLC31A1      |                | TECPR2       |                | TPCN1        |
|                                | MRS2         |                | GATAD2B      |                | KCNK3        |
|                                | NEDD4L       |                | PLEKHA1      |                | SOCS5        |
|                                | RASGRP1      |                | PCMTD1       |                | CEP41        |
|                                | EEF2K        |                | FOXN3        |                | TSSK6        |
|                                | TMEM143      |                | DNAJC30      |                | ATL3         |
|                                | SOX11        |                | LDLRAD4      |                | ELOVL6       |

|                 |         |           |          |
|-----------------|---------|-----------|----------|
|                 | SOCS4   | TMEM87A   | PPARGC1B |
|                 | HIP1    | PDS5B     | CAMK2A   |
|                 | CASK    | DCX       | GRM7     |
|                 | ZDHHC21 | CCNJL     | EIF4G2   |
|                 | SOX12   | C20orf194 | SLC17A6  |
|                 | MAPK8   | LPP       | ZBTB20   |
|                 | YY1     | ANGPTL2   | TMCC1    |
|                 | SFMBT1  | COL5A1    | SEC31B   |
|                 | AAK1    | PLEKHB2   | C2CD4C   |
|                 | HAND1   | NCKAP5    | HOXC8    |
|                 | NME4    | NPC1      | PAWR     |
|                 | PSMD11  | SOCS6     | CNOT2    |
|                 | CDV3    | TRAF3     | SMARCA5  |
|                 | YIPF6   | SEMA6D    | EIF1     |
|                 | SLC30A6 | ARPP19    | XPR1     |
|                 | DFFA    | LUZP1     | GAN      |
| hsa-miR-365a-5p | HNRNPC  | RORA      | KDM2A    |
| hsa-miR-629-5p  | MTRF1L  | NEO1      | NACC2    |
|                 | EIF1AD  | RNF157    | APOBEC3F |
| hsa-miR-675-3p  | OPCML   | ATRX      | ZNF24    |
|                 | ZNF268  | PCDH11X   |          |

---

Supplementary Table S5: Pathway enrichment analysis

| Pathway enrichment analysis |            |                                                           |                                                                                  |         |
|-----------------------------|------------|-----------------------------------------------------------|----------------------------------------------------------------------------------|---------|
| SourceDB                    | Term.id    | Term.name                                                 | Intersection                                                                     | P value |
| Gene Ontology               | GO:0019216 | regulation of lipid metabolic process                     | DKK3;DAB2IP;INSIG1;VAV3;SOCS6;RORA;TBL1XR1;PIK3R3;SOCS5;ELOVL6;ZBTB20;SP1;GLIPR1 | 0.00    |
| KEGG                        | hsa04917   | Prolactin signaling pathway                               | RELA;SOCS4;MAPK8;SOCS6;PIK3R3;SOCS5                                              | 0.00    |
| KEGG                        | hsa04668   | TNF signaling pathway                                     | MAP2K4;DAB2IP;RELA;MAPK8;TRAF3;PIK3R3;CXCL5                                      | 0.00    |
| KEGG                        | hsa05169   | Epstein-Barr virus infection                              | MAP2K4;E2F3;BCL2L11;RELA;MAPK8;PSMD11;TRAF3;PIK3R3                               | 0.00    |
| Gene Ontology               | GO:0062012 | regulation of small molecule metabolic process            | SLC7A11;DKK3;ATP7A;INSIG1;DNAJC30;ARPP19;RORA;ELOVL6;ZBTB20;SP1                  | 0.00    |
| Gene Ontology               | GO:0048880 | sensory system development                                | MAN2A1;SLC7A11;TENM3;SOX11;YY1;PDS5B;DCX;COL5A1;NECTIN1;GDF11                    | 0.00    |
| Gene Ontology               | GO:0035148 | tube formation                                            | DAB2IP;BCL2L11;SOX11;HAND1;LUZP1;NFIB                                            | 0.00    |
| Gene Ontology               | GO:0090596 | sensory organ morphogenesis                               | MAN2A1;INSIG1;TENM3;SOX11;YY1;COL5A1;NECTIN1;GDF11                               | 0.00    |
| KEGG                        | hsa04210   | Apoptosis                                                 | DAB2IP;BCL2L11;RELA;MAPK8;PIK3R3;DFFA                                            | 0.00    |
| KEGG                        | hsa05142   | Chagas disease (American trypanosomiasis)                 | GNAQ;MAP2K4;RELA;MAPK8;PIK3R3                                                    | 0.00    |
| KEGG                        | hsa04620   | Toll-like receptor signaling pathway                      | MAP2K4;RELA;MAPK8;TRAF3;PIK3R3                                                   | 0.00    |
| Gene Ontology               | GO:0098732 | macromolecule deacylation                                 | MIER3;MAPK8;TBL1XR1;ATXN3;NACC2                                                  | 0.00    |
| KEGG                        | hsa04664   | Fc epsilon RI signaling pathway                           | MAP2K4;VAV3;MAPK8;PIK3R3                                                         | 0.00    |
| Gene Ontology               | GO:0030323 | respiratory tube development                              | MAN2A1;SLC7A11;ATP7A;ATXN1L;SOX11;NFIB                                           | 0.01    |
| Gene Ontology               | GO:0048705 | skeletal system morphogenesis                             | MEF2D;INSIG1;PLEKHA1;FOXN3;SOX11;PPARGC1B;HOXC8                                  | 0.01    |
| Gene Ontology               | GO:0002931 | response to ischemia                                      | EEF2K;CAMK2A;CPEB4                                                               | 0.01    |
| Gene Ontology               | GO:0061614 | pri-miRNA transcription by RNA polymerase II              | RELA;YY1;NFIB                                                                    | 0.01    |
| Gene Ontology               | GO:0060541 | respiratory system development                            | MAN2A1;SLC7A11;ATP7A;ATXN1L;SOX11;NFIB                                           | 0.01    |
| Gene Ontology               | GO:0060021 | roof of mouth development                                 | INSIG1;PLEKHA1;SOX11;GDF11                                                       | 0.01    |
| Gene Ontology               | GO:0034248 | regulation of cellular amide metabolic process            | IGF2BP1;SLC7A11;FXR1;QKI;LIN28A;EIF4G2;CNOT2;CPEB4;EIF1                          | 0.01    |
| Gene Ontology               | GO:0038127 | ERBB signaling pathway                                    | DAB2IP;PTPRJ;SOCS4;HIP1;SOCS5                                                    | 0.01    |
| Gene Ontology               | GO:0061448 | connective tissue development                             | MEF2D;ATP7A;RELA;HAND1;COL5A1;TBL1XR1;NFIB                                       | 0.01    |
| Gene Ontology               | GO:0048008 | platelet-derived growth factor receptor signaling pathway | PTPRJ;PLEKHA1;HIP1                                                               | 0.01    |
| Gene Ontology               | GO:0071241 | cellular response to inorganic substance                  | ATP7A;EEF2K;MAPK8;ATRX;KCNA1;KCNK3                                               | 0.01    |
| Gene Ontology               | GO:0009896 | positive regulation of catabolic process                  | DAB2IP;BCL2L11;NEDD4L;SOCS4;PIP4K2C;ATXN3;TPCN1;SOCS5;ZBTB20                     | 0.01    |
| KEGG                        | hsa05212   | Pancreatic cancer                                         | E2F3;RELA;MAPK8;PIK3R3                                                           | 0.01    |
| KEGG                        | hsa04611   | Platelet activation                                       | GNAQ;RASGRP1;PPP1R12A;PIK3R3;MYLK                                                | 0.01    |
| KEGG                        | hsa05167   | Kaposi sarcoma-associated herpesvirus infection           | MAP2K4;E2F3;RELA;MAPK8;TRAF3;PIK3R3                                              | 0.01    |
| KEGG                        | hsa04012   | ErbB signaling pathway                                    | MAP2K4;MAPK8;PIK3R3;CAMK2A                                                       | 0.01    |
| KEGG                        | hsa04930   | Type II diabetes mellitus                                 | SOCS4;MAPK8;PIK3R3                                                               | 0.01    |
| KEGG                        | hsa04024   | cAMP signaling pathway                                    | VAV3;RELA;MAPK8;PPP1R12A;PIK3R3;CAMK2A                                           | 0.01    |
| KEGG                        | hsa04657   | IL-17 signaling pathway                                   | RELA;MAPK8;TRAF3;CXCL5                                                           | 0.01    |
| KEGG                        | hsa04912   | GnRH signaling pathway                                    | GNAQ;MAP2K4;MAPK8;CAMK2A                                                         | 0.01    |
| KEGG                        | hsa05222   | Small cell lung cancer                                    | E2F3;RELA;TRAF3;PIK3R3                                                           | 0.01    |
| KEGG                        | hsa05161   | Hepatitis B                                               | MAP2K4;E2F3;RELA;MAPK8;PIK3R3                                                    | 0.01    |

|               |            |                                                            |                                                              |      |
|---------------|------------|------------------------------------------------------------|--------------------------------------------------------------|------|
| KEGG          | hsa04932   | Non-alcoholic fatty liver disease (NAFLD)                  | BCL2L11;UQCR11;RELA;MAPK8;PIK3R3                             | 0.01 |
| KEGG          | hsa01522   | Endocrine resistance                                       | E2F3;MAPK8;PIK3R3;SP1                                        | 0.01 |
| KEGG          | hsa04750   | Inflammatory mediator regulation of TRP channels           | GNAQ;MAPK8;PIK3R3;CAMK2A                                     | 0.01 |
| KEGG          | hsa04921   | Oxytocin signaling pathway                                 | GNAQ;EEF2K;PPP1R12A;CAMK2A;MYLK                              | 0.01 |
| KEGG          | hsa04934   | Cushing syndrome                                           | GNAQ;E2F3;KCNK3;CAMK2A;SP1                                   | 0.01 |
| KEGG          | hsa04660   | T cell receptor signaling pathway                          | VAV3;RELA;RASGRP1;PIK3R3                                     | 0.01 |
| Gene Ontology | GO:0010948 | negative regulation of cell cycle process                  | DAB2IP;FOXN3;ATRX;CNOT2;NACC2;CDC73;ZNF268                   | 0.02 |
| Gene Ontology | GO:0009895 | negative regulation of catabolic process                   | IGF2BP1;DAB2IP;RELA;NPC1;EIF4G2;DFFA;HNRNPC                  | 0.02 |
| Gene Ontology | GO:0016358 | dendrite development                                       | RBFOX2;DAB2IP;NEDD4L;EEF2K;PPP1R9A;CAMK2A                    | 0.02 |
| Gene Ontology | GO:0071216 | cellular response to biotic stimulus                       | DAB2IP;BCL2L11;RELA;MAPK8;CXCL5;CDC73                        | 0.02 |
| KEGG          | hsa04931   | Insulin resistance                                         | RELA;MAPK8;PIK3R3;PPARGC1B                                   | 0.02 |
| Gene Ontology | GO:0019748 | secondary metabolic process                                | MYO5A;SLC7A11;SP1                                            | 0.02 |
| Gene Ontology | GO:0000041 | transition metal ion transport                             | ATP7A;SLC31A1;NECTIN1;SLC30A6                                | 0.02 |
| Gene Ontology | GO:0032606 | type I interferon production                               | RELA;YY1;TRAF3;ZBTB20                                        | 0.02 |
| Gene Ontology | GO:0042303 | molting cycle                                              | MYO5A;ATP7A;RELA;ZDHHC21                                     | 0.02 |
| KEGG          | hsa04927   | Cortisol synthesis and secretion                           | GNAQ;SP1;KCNK3                                               | 0.02 |
| Gene Ontology | GO:0035459 | cargo loading into vesicle                                 | INSIG1;SEC31B                                                | 0.02 |
| KEGG          | hsa04137   | Mitophagy                                                  | SP1;RELA;MAPK8                                               | 0.02 |
| Gene Ontology | GO:0055094 | response to lipoprotein particle                           | NPC1;SOCS5                                                   | 0.02 |
| Gene Ontology | GO:0050769 | positive regulation of neurogenesis                        | MAN2A1;DAB2IP;RELA;TENM3;NEDD4L;EEF2K;SOX11;PPP1R9A;LIN28A   | 0.02 |
| KEGG          | hsa04071   | Sphingolipid signaling pathway                             | GNAQ;RELA;MAPK8;PIK3R3                                       | 0.02 |
| Gene Ontology | GO:0010498 | proteasomal protein catabolic process                      | DNAJB12;DAB2IP;FBXO33;NEDD4L;SOCS4;SOCS6;TBL1XR1;ATXN3;SOCS5 | 0.03 |
| Gene Ontology | GO:0008202 | steroid metabolic process                                  | DKK3;INSIG1;PLEKHA1;SP1;NPC1;RORA;ELOVL6                     | 0.03 |
| KEGG          | hsa04722   | Neurotrophin signaling pathway                             | RELA;MAPK8;PIK3R3;CAMK2A                                     | 0.03 |
| KEGG          | hsa05120   | Epithelial cell signaling in Helicobacter pylori infection | MAP2K4;RELA;MAPK8                                            | 0.03 |
| KEGG          | hsa05200   | Pathways in cancer                                         | GNAQ;E2F3;BCL2L11;SP1;RELA;RASGRP1;MAPK8;TRAF3;PIK3R3;CAMK2A | 0.03 |
| Gene Ontology | GO:0010657 | muscle cell apoptotic process                              | MAP2K4;E2F3;CAMK2A                                           | 0.03 |
| KEGG          | hsa04622   | RIG-I-like receptor signaling pathway                      | RELA;MAPK8;TRAF3                                             | 0.03 |
| Gene Ontology | GO:0021591 | ventricular system development                             | SLC7A11;SEMA6D                                               | 0.03 |
| Gene Ontology | GO:0071402 | cellular response to lipoprotein particle stimulus         | NPC1;SOCS5                                                   | 0.03 |
| Gene Ontology | GO:0050808 | synapse organization                                       | MYO5A;SPOCK2;SLC7A11;DAB2IP;EEF2K;NECTIN1;PPP1R9A;NFIA       | 0.03 |
| Gene Ontology | GO:0044843 | cell cycle G1/S phase transition                           | BACH1;BCAT1;CNOT2;NACC2;CDC73;CAMK2A                         | 0.03 |
| KEGG          | hsa04662   | B cell receptor signaling pathway                          | VAV3;RELA;PIK3R3                                             | 0.03 |
| KEGG          | hsa05214   | Glioma                                                     | E2F3;PIK3R3;CAMK2A                                           | 0.03 |
| Gene Ontology | GO:0048545 | response to steroid hormone                                | NR6A1;RBFOX2;BCL2L11;CNOT2;RELA;NPC1;RORA;PPARGC1B           | 0.03 |
| Gene Ontology | GO:0055088 | lipid homeostasis                                          | INSIG1;NPC1;RORA;ZBTB20                                      | 0.03 |
| Gene Ontology | GO:0010586 | miRNA metabolic process                                    | RELA;LIN28A                                                  | 0.03 |

|               |            |                                                           |                                                         |      |
|---------------|------------|-----------------------------------------------------------|---------------------------------------------------------|------|
| Gene Ontology | GO:0036314 | response to sterol                                        | INSIG1;RORA                                             | 0.03 |
| Gene Ontology | GO:0042476 | odontogenesis                                             | MYO5A;BCL2L11;HAND1;NECTIN1                             | 0.03 |
| KEGG          | hsa01524   | Platinum drug resistance                                  | ATP7A;SLC31A1;PIK3R3                                    | 0.03 |
| Gene Ontology | GO:0016569 | covalent chromatin modification                           | KANSL1;KDM2A;NACC2;CDC73;MIER3;MAPK8;ATRX;TBL1XR1;ATXN3 | 0.03 |
| KEGG          | hsa04062   | Chemokine signaling pathway                               | CCR9;VAV3;RELA;PIK3R3;CXCL5                             | 0.03 |
| KEGG          | hsa04971   | Gastric acid secretion                                    | GNAQ;MYLK;CAMK2A                                        | 0.03 |
| Gene Ontology | GO:0090287 | regulation of cellular response to growth factor stimulus | DKK3;DAB2IP;SOX11;CASK;LDLRAD4;NEO1                     | 0.03 |
| KEGG          | hsa04926   | Relaxin signaling pathway                                 | MAP2K4;RELA;MAPK8;PIK3R3                                | 0.03 |
| KEGG          | hsa05133   | Pertussis                                                 | RELA;MAPK8;CXCL5                                        | 0.03 |
| KEGG          | hsa05220   | Chronic myeloid leukemia                                  | E2F3;RELA;PIK3R3                                        | 0.03 |
| KEGG          | hsa05160   | Hepatitis C                                               | RELA;MAPK8;TRAF3;PIK3R3                                 | 0.03 |
| Gene Ontology | GO:0090559 | regulation of membrane permeability                       | BCL2L11;MAPK8;CAMK2A                                    | 0.04 |
| Gene Ontology | GO:2000272 | negative regulation of signaling receptor activity        | SOCS4;SOCS5                                             | 0.04 |
| KEGG          | hsa04215   | Apoptosis                                                 | BCL2L11;MAPK8                                           | 0.04 |
| Gene Ontology | GO:0001505 | regulation of neurotransmitter levels                     | KCNC4;SLC7A11;ATP7A;CASK;RORA;PPP1R9A;CAMK2A            | 0.04 |
| Gene Ontology | GO:0002764 | immune response-regulating signaling pathway              | DAB2IP;PTPRJ;PLEKHA1;PAWR;DENND1B;VAV3;RELA;MAPK8;TRAF3 | 0.04 |
| Gene Ontology | GO:1903311 | regulation of mRNA metabolic process                      | IGF2BP1;RBF2;FXR1;HNRNPC;CDC73;CELF2                    | 0.04 |
| Gene Ontology | GO:0010608 | posttranscriptional regulation of gene expression         | IGF2BP1;FXR1;HNRNPC;CNOT2;CPEB4;EIF1;QKI;LIN28A;EIF4G2  | 0.04 |
| KEGG          | hsa04510   | Focal adhesion                                            | MYLK;VAV3;MAPK8;PPP1R12A;PIK3R3                         | 0.04 |
| Gene Ontology | GO:0044772 | mitotic cell cycle phase transition                       | BACH1;FOXN3;BCAT1;CNOT2;NACC2;CDC73;ARPP19;CEP41;CAMK2A | 0.04 |
| Gene Ontology | GO:0006836 | neurotransmitter transport                                | KCNC4;SLC7A11;CASK;PPP1R9A;CAMK2A;SLC17A6               | 0.04 |
| KEGG          | hsa05418   | Fluid shear stress and atherosclerosis                    | MAP2K4;RELA;MAPK8;PIK3R3                                | 0.04 |
| Gene Ontology | GO:0002683 | negative regulation of immune system process              | DAB2IP;PTPRJ;PAWR;CDC73;SOX11;SOCS6;LRCH1;SOCS5         | 0.04 |
| Gene Ontology | GO:0048144 | fibroblast proliferation                                  | DAB2IP;PAWR;CDC73                                       | 0.04 |
| Gene Ontology | GO:0042092 | type 2 immune response                                    | DENND1B;SOCS5                                           | 0.04 |
| Gene Ontology | GO:0060627 | regulation of vesicle-mediated transport                  | PTPRJ;INSIG1;RAB8B;NEDD4L;EEF2K;HIP1;CASK;AAK1;CAMK2A   | 0.04 |
| Gene Ontology | GO:0035690 | cellular response to drug                                 | GNAQ;PLEKHA1;PAWR;RELA;SLC31A1;ATRX;PPP1R12A            | 0.05 |
| KEGG          | hsa05210   | Colorectal cancer                                         | BCL2L11;MAPK8;PIK3R3                                    | 0.05 |
| KEGG          | hsa04960   | Aldosterone-regulated sodium reabsorption                 | NEDD4L;PIK3R3                                           | 0.05 |
| Gene Ontology | GO:0051668 | localization within membrane                              | SLC7A11;INSIG1;HIP1;SEC31B                              | 0.05 |
| Gene Ontology | GO:0098727 | maintenance of cell number                                | IGF2BP1;CNOT2;CDC73;LIN28A                              | 0.05 |
| KEGG          | hsa05170   | Human immunodeficiency virus 1 infection                  | GNAQ;APOBEC3F;RELA;MAPK8;PIK3R3                         | 0.05 |
| Gene Ontology | GO:0006979 | response to oxidative stress                              | SLC7A11;ATP7A;PLEKHA1;PAWR;SP1;RELA;MAPK8;PPARGC1B      | 0.05 |
| KEGG          | hsa04810   | Regulation of actin cytoskeleton                          | MYLK;VAV3;PIP4K2C;PPP1R12A;PIK3R3                       | 0.05 |
| Gene Ontology | GO:0010038 | response to metal ion                                     | ATP7A;NEDD4L;EEF2K;MAPK8;NPC1;KCNA1;KCNC3               | 0.05 |



## REFERENCES

67. Kim BH, Hong SW, Kim A, et al. Prognostic implications for high expression of oncogenic microRNAs in advanced gastric carcinoma. *J Surg Oncol* 2013;107:505-10.
68. Long M, Zhan M, Xu S, et al. miR-92b-3p acts as a tumor suppressor by targeting Gabra3 in pancreatic cancer. *Mol Cancer* 2017;16:167.
69. Papaconstantinou IG, Manta A, Gazouli M, et al. Expression of microRNAs in patients with pancreatic cancer and its prognostic significance. *Pancreas* 2013;42:67-71.
70. Greither T, Grochola LF, Udelnow A, et al. Elevated expression of microRNAs 155, 203, 210 and 222 in pancreatic tumors is associated with poorer survival. *Int J Cancer* 2010;126:73-80.
71. Nakamura S, Sadakari Y, Ohtsuka T, et al. Pancreatic Juice Exosomal MicroRNAs as Biomarkers for Detection of Pancreatic Ductal Adenocarcinoma. *Ann Surg Oncol* 2019;26:2104-2111.
72. Frampton AE, Krell J, Jamieson NB, et al. microRNAs with prognostic significance in pancreatic ductal adenocarcinoma: A meta-analysis. *Eur J Cancer* 2015;51:1389-404.
73. Ulivi P, Canale M, Passardi A, et al. Circulating Plasma Levels of miR-20b, miR-29b and miR-155 as Predictors of Bevacizumab Efficacy in Patients with Metastatic Colorectal Cancer. *Int J Mol Sci* 2018;19.
74. Ning S, Liu H, Gao B, et al. miR-155, miR-96 and miR-99a as potential diagnostic and prognostic tools for the clinical management of hepatocellular carcinoma. *Oncol Lett* 2019;18:3381-3387.
75. Xu S, Shi L. High expression of miR-155 and miR-21 in the recurrence or metastasis of non-small cell lung cancer. *Oncol Lett* 2019;18:758-763.
76. Shao C, Yang F, Qin Z, et al. The value of miR-155 as a biomarker for the diagnosis and prognosis of lung cancer: a systematic review with meta-analysis. *BMC Cancer* 2019;19:1103.
77. Baumgart S, Meschkat P, Edelmann P, et al. MicroRNAs in tumor samples and urinary extracellular vesicles as a putative diagnostic tool for muscle-invasive bladder cancer. *J Cancer Res Clin Oncol* 2019;145:2725-2736.
78. Kovarikova J, Baranova I, Laco J, et al. Deregulation of Selected MicroRNAs in Sinonasal Squamous Cell Carcinoma: Searching for Potential Prognostic Biomarkers. *Folia Biol (Praha)* 2019;65:142-151.
79. Yang H, Wang Y. Five miRNAs considered as molecular targets for predicting neuroglioma. *Tumour Biol* 2016;37:1051-9.
80. Kanno S, Noshio K, Ishigami K, et al. MicroRNA-196b is an independent prognostic biomarker in patients with pancreatic cancer. *Carcinogenesis* 2017;38:425-431.
81. Bartsch DK, Gercke N, Strauch K, et al. The Combination of MiRNA-196b, LCN2, and TIMP1 is a Potential Set of Circulating Biomarkers for Screening Individuals at Risk for Familial Pancreatic Cancer. *J Clin Med* 2018;7.
82. Schultz NA, Werner J, Willenbrock H, et al. MicroRNA expression profiles associated with pancreatic adenocarcinoma and ampullary adenocarcinoma. *Mod Pathol* 2012;25:1609-22.
83. Li CY, Liang GY, Yao WZ, et al. Identification and functional characterization of microRNAs

- reveal a potential role in gastric cancer progression. *Clin Transl Oncol* 2017;19:162-172.
84. Tsai MM, Wang CS, Tsai CY, et al. Circulating microRNA-196a/b are novel biomarkers associated with metastatic gastric cancer. *Eur J Cancer* 2016;64:137-48.
  85. Hu J, Xu Y, Cai S. Specific microRNAs as novel biomarkers for combination chemotherapy resistance detection of colon adenocarcinoma. *Eur J Med Res* 2015;20:95.
  86. Slattery ML, Herrick JS, Mullany LE, et al. Colorectal tumor molecular phenotype and miRNA: expression profiles and prognosis. *Mod Pathol* 2016;29:915-27.
  87. Xu C, Gu L. The diagnostic effect of serum miR-196b as biomarker in colorectal cancer. *Biomed Rep* 2017;6:39-45.
  88. Li W, Chang J, Tong D, et al. Differential microRNA expression profiling in primary tumors and matched liver metastasis of patients with colorectal cancer. *Oncotarget* 2017;8:35783-35791.
  89. Ren W, Wu S, Wu Y, et al. MicroRNA-196a/-196b regulate the progression of hepatocellular carcinoma through modulating the JAK/STAT pathway via targeting SOCS2. *Cell Death Dis* 2019;10:333.
  90. Zhang L, Luo B, Dang YW, et al. Clinical Significance of microRNA-196b-5p in Hepatocellular Carcinoma and its Potential Molecular Mechanism. *J Cancer* 2019;10:5355-5370.
  91. Lu YC, Chang JT, Huang YC, et al. Combined determination of circulating miR-196a and miR-196b levels produces high sensitivity and specificity for early detection of oral cancer. *Clin Biochem* 2015;48:115-21.
  92. He Y, Shi Y, Liu R, et al. PELI3 mediates pro-tumor actions of down-regulated miR-365a-5p in non-small cell lung cancer. *Biol Res* 2019;52:24.
  93. Shi W, Lu Y, Gong R, et al. Serum miR-629 is a novel molecular marker for diagnosis and the prognosis of pancreatic cancer. *Eur Rev Med Pharmacol Sci* 2018;22:5187-5193.
  94. Shin VY, Ng EK, Chan VW, et al. A three-miRNA signature as promising non-invasive diagnostic marker for gastric cancer. *Mol Cancer* 2015;14:202.
  95. Ma G, Jing C, Li L, et al. MicroRNA-92b represses invasion-metastasis cascade of esophageal squamous cell carcinoma. *Oncotarget* 2016;7:20209-22.
  96. Zhou X, Zhu W, Li H, et al. Diagnostic value of a plasma microRNA signature in gastric cancer: a microRNA expression analysis. *Sci Rep* 2015;5:11251.
  97. Kiss I, Mlcochova J, Souckova K, et al. MicroRNAs as outcome predictors in patients with metastatic colorectal cancer treated with bevacizumab in combination with FOLFOX. *Oncol Lett* 2017;14:743-750.
  98. Neerincx M, Poel D, Sie DLS, et al. Combination of a six microRNA expression profile with four clinicopathological factors for response prediction of systemic treatment in patients with advanced colorectal cancer. *PLoS One* 2018;13:e0201809.
  99. Min L, Chen L, Liu S, et al. Loss of Circulating Exosomal miR-92b is a Novel Biomarker of Colorectal Cancer at Early Stage. *Int J Med Sci* 2019;16:1231-1237.
  100. Zhuang LK, Yang YT, Ma X, et al. MicroRNA-92b promotes hepatocellular carcinoma progression by targeting Smad7 and is mediated by long non-coding RNA XIST. *Cell Death Dis* 2016;7:e2203.
  101. Nakano T, Chen IH, Wang CC, et al. Circulating exosomal miR-92b: Its role for cancer immunoediting and clinical value for prediction of posttransplant hepatocellular carcinoma recurrence. *Am J Transplant* 2019;19:3250-3262.

102. Zhao C, Zhao F, Feng H, et al. MicroRNA-92b inhibits epithelial-mesenchymal transition-induced migration and invasion by targeting Smad3 in nasopharyngeal cancer. *Oncotarget* 2017;8:91603-91613.
103. Li YY, Zheng XH, Deng AP, et al. MiR-92b inhibited cells EMT by targeting Gabra3 and predicted prognosis of triple negative breast cancer patients. *Eur Rev Med Pharmacol Sci* 2019;23:10433-10442.
104. Yan Y, Wang X, Veno MT, et al. Circulating miRNAs as biomarkers for oral squamous cell carcinoma recurrence in operated patients. *Oncotarget* 2017;8:8206-8214.
105. Liu Z, Diep C, Mao T, et al. MicroRNA-92b promotes tumor growth and activation of NF-kappaB signaling via regulation of NLK in oral squamous cell carcinoma. *Oncol Rep* 2015;34:2961-8.
106. Xu T, Wang H, Jiang M, et al. The E3 ubiquitin ligase CHIP/miR-92b/PTEN regulatory network contributes to tumorigenesis of glioblastoma. *Am J Cancer Res* 2017;7:289-300.

# Supplementary Figure 1

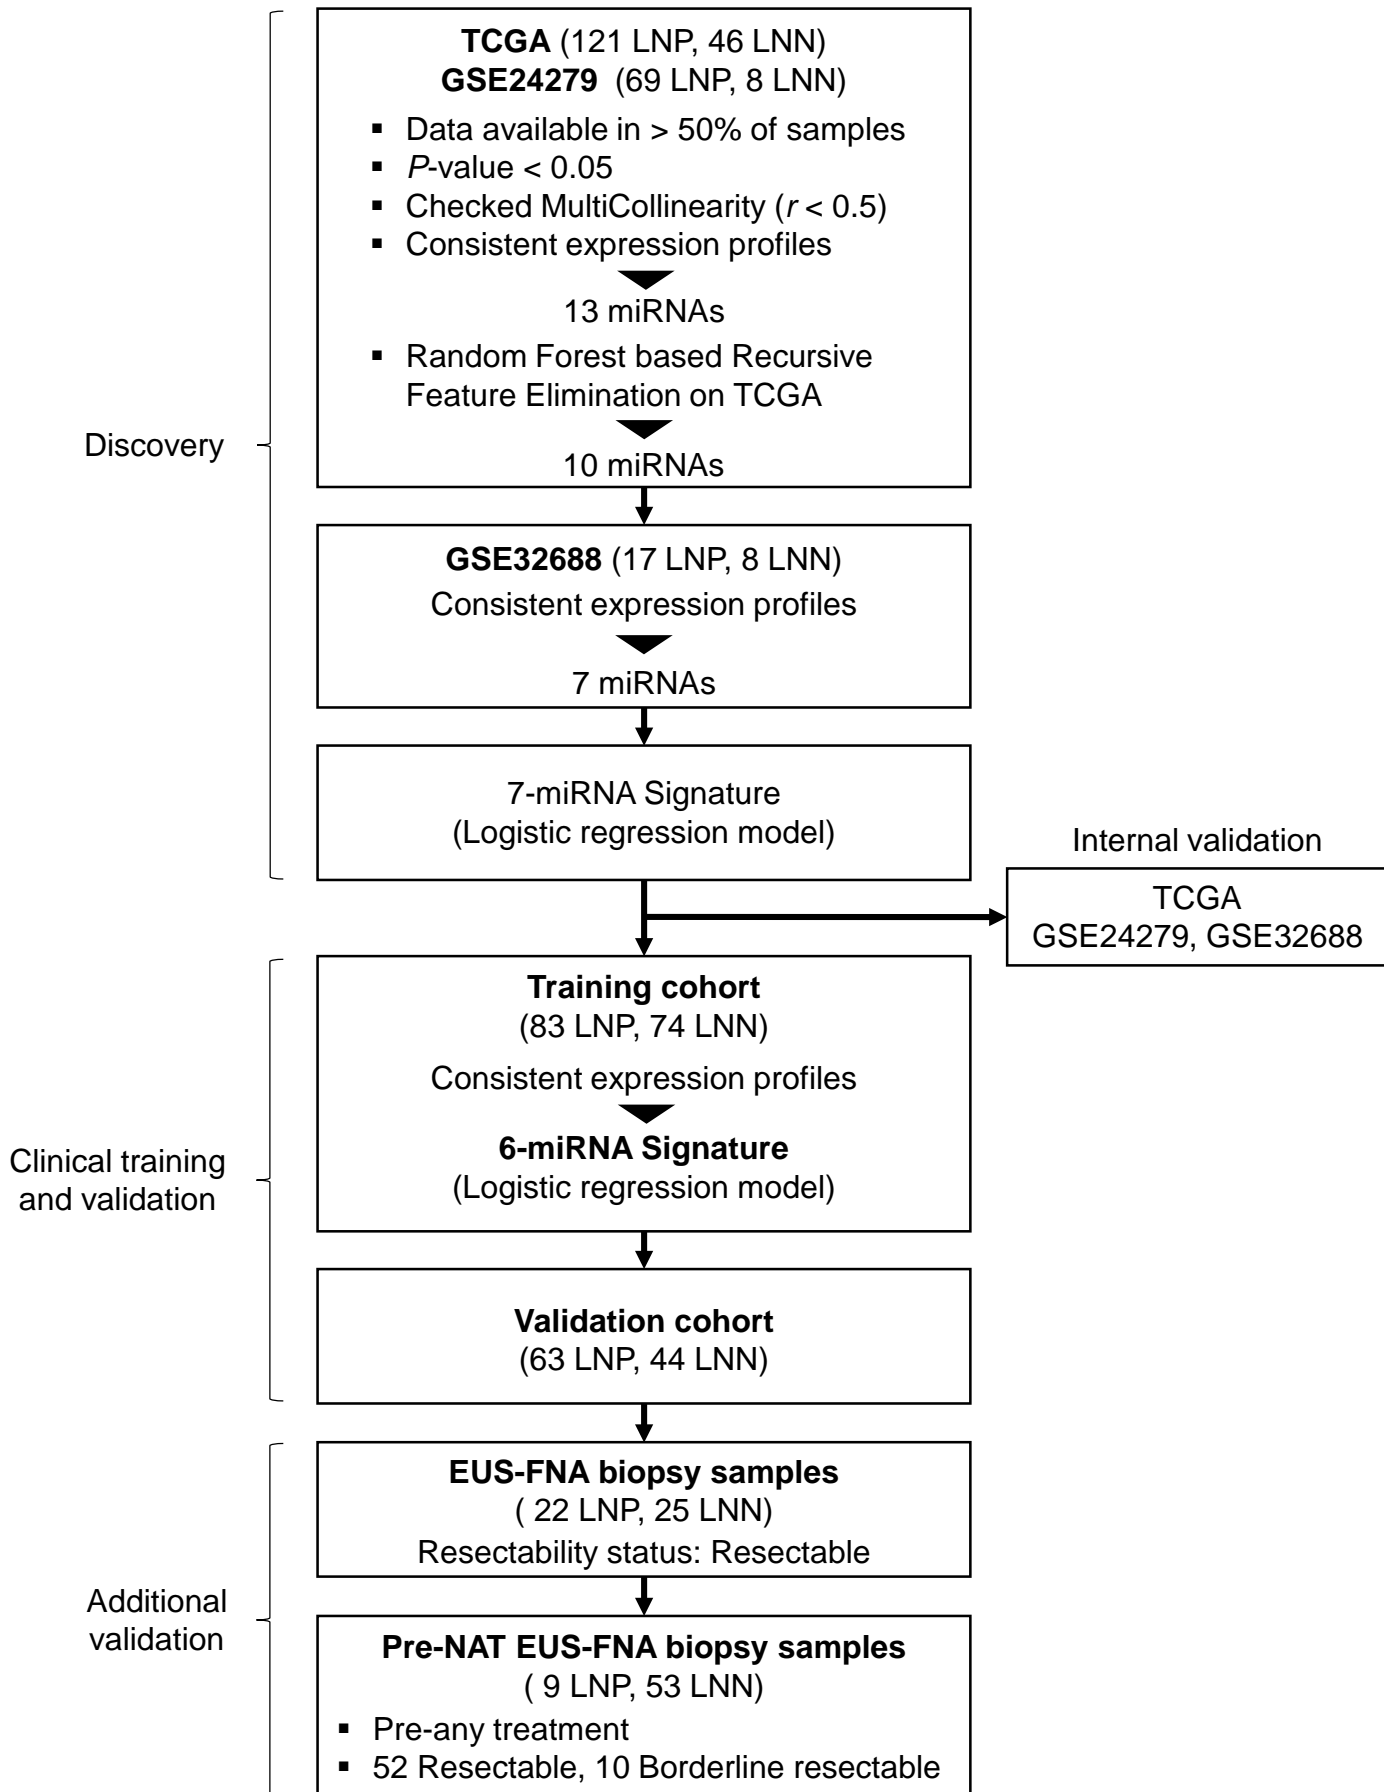

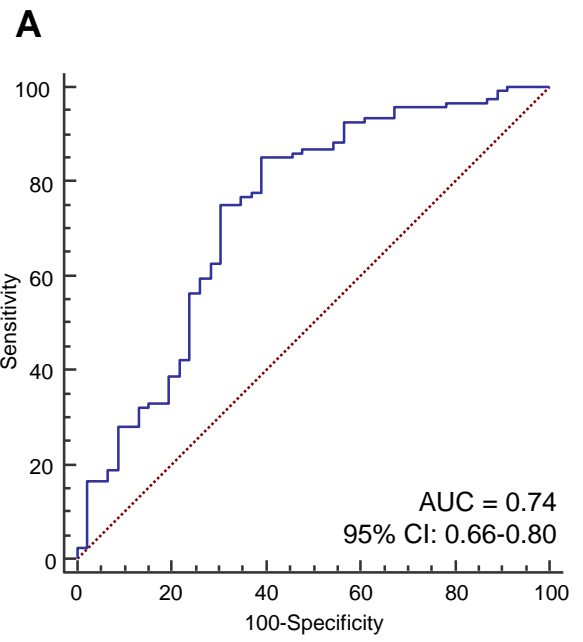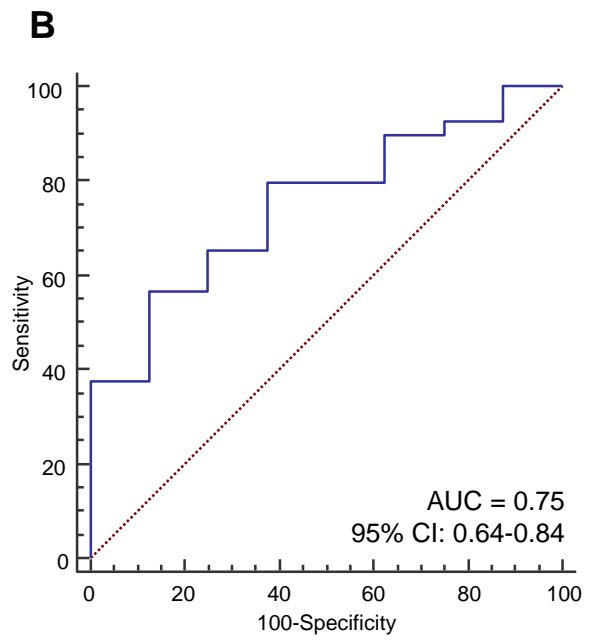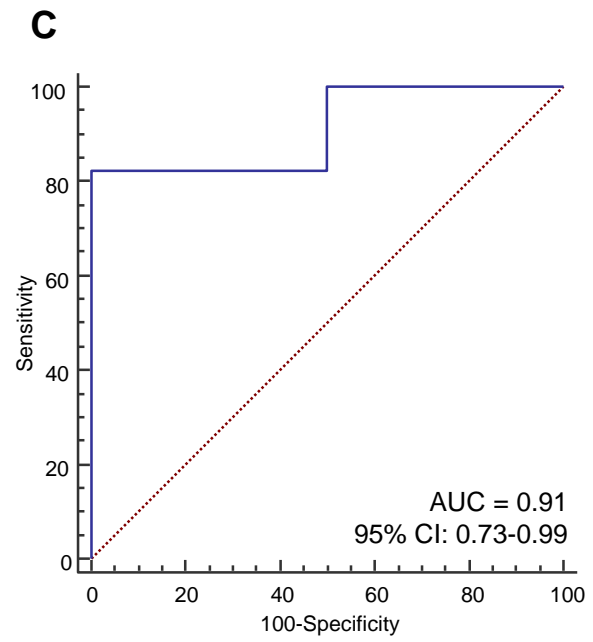

Supplementary Figure 3

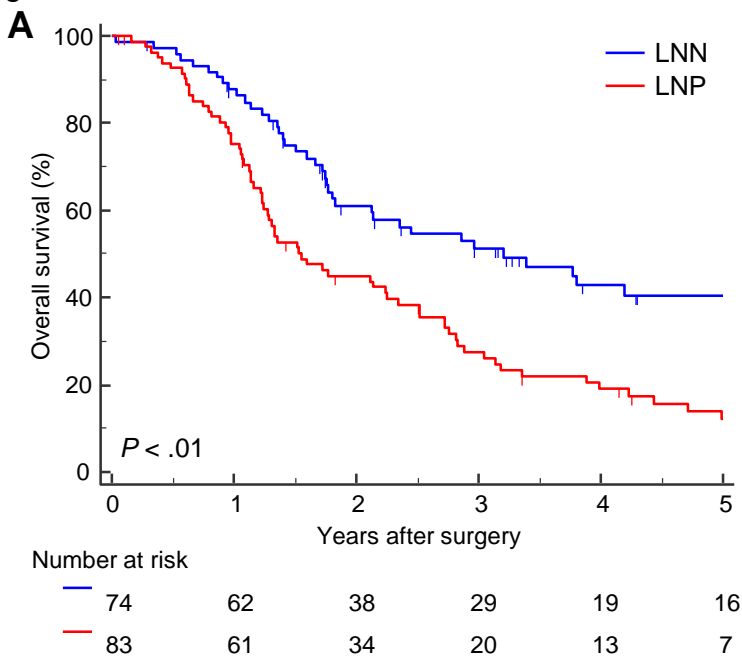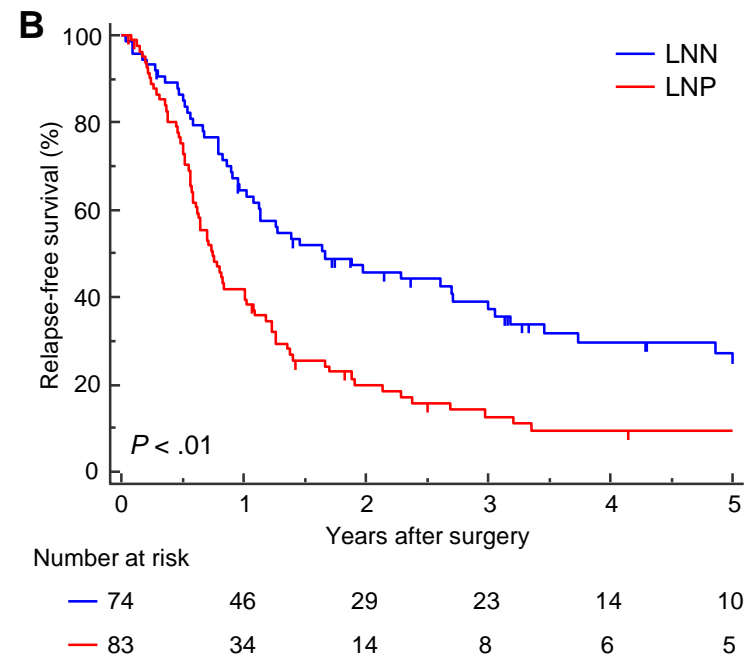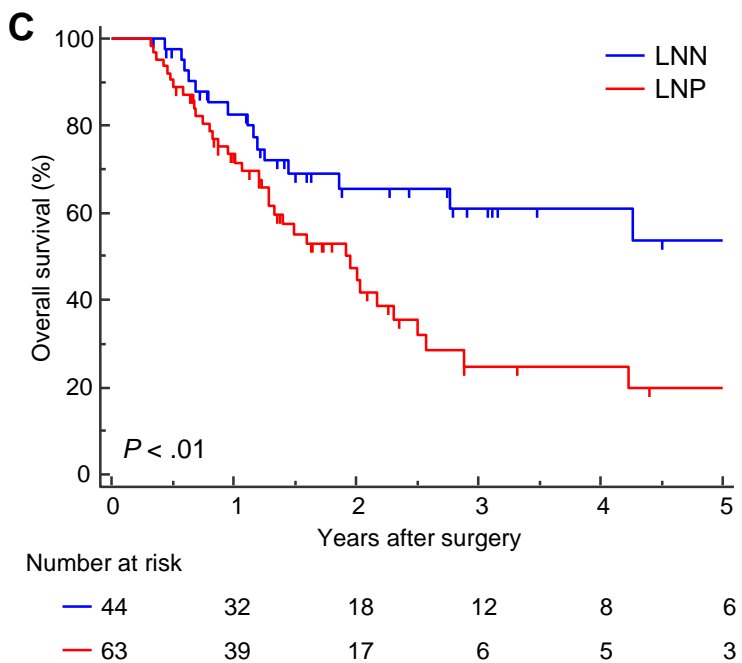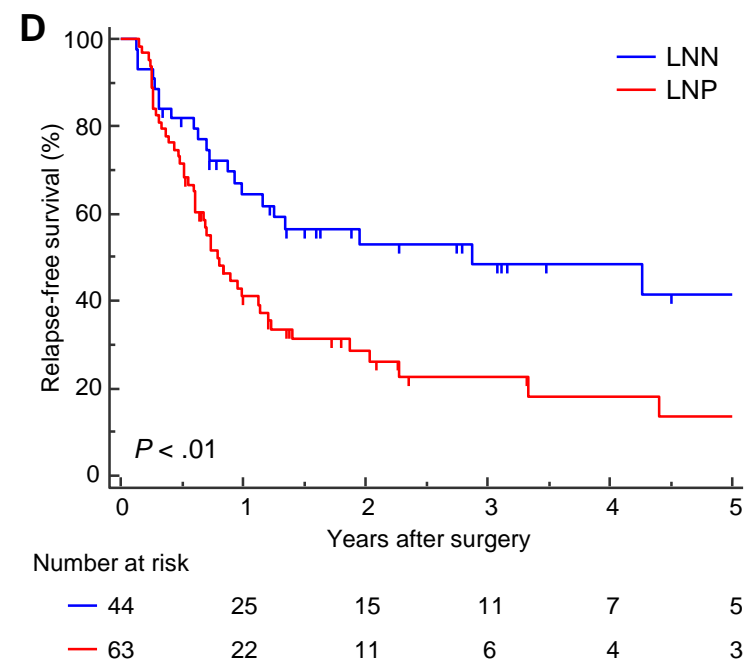

Supplementary Figure 4

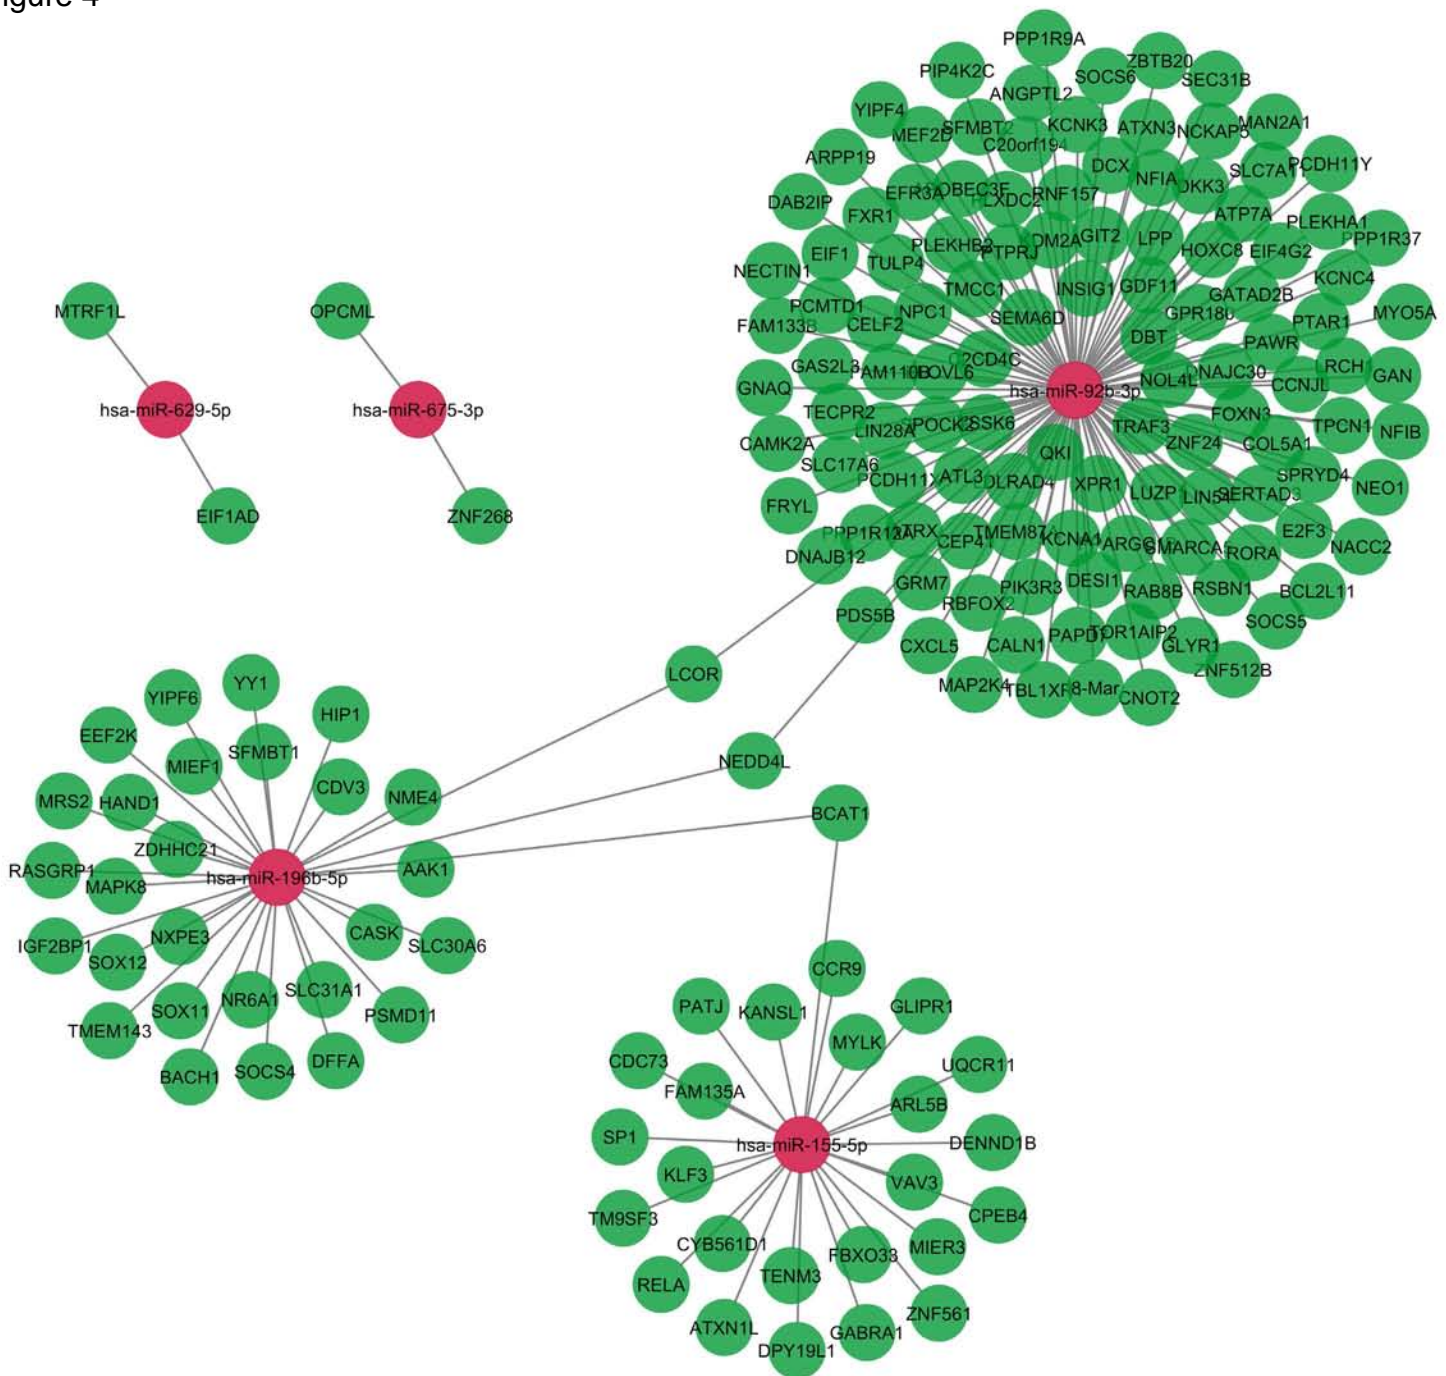

Supplement: NIHMS1590519-supplement-1.pdf [file NIHMS1590519-supplement-1.pdf]
